# Supplementary material
Source: HighWire-hosted journal article supplement (http://molpharm.aspetjournals.org/highwire/filestream/77107/field_highwire_adjunct_files/0/LuGPR18SupplementalRev.pdf)
Supplement: LuGPR18SupplementalRev.pdf [file LuGPR18SupplementalRev.pdf]

**Supplemental Data:**

Van B. Lu, Henry L. Puhl III and Stephen R. Ikeda

N-arachidonyl glycine (NAGly) does not activate G protein-coupled receptor 18 (GPR18)  
signaling via canonical pathways

Molecular Pharmacology

*Supplementary Figure Legends:*

**Supplementary Figure 1:** GPR18 sequencing results and protein alignment. A) Sequencing results of the mouse GPR18 clone used in this study. Underlined sequence is the open reading frame. Highlighted in yellow is the mismatched nucleotide based on NM\_182806.1 (*Mus musculus* GPR18 RefSeq accession number). The mismatch results in a synonymous mutation (CCG → CCA, Proline). B) Partial sequences of tagged GPR18 used in this study, specifically the junction between tagging sequences and GPR18. Underlined sequence is part of the GPR18 sequence. Highlighted in green is the sequence for EGFP and highlighted in orange is the sequence for one HA-tag. Note both sequences are in frame. C) ClustalW protein sequence alignment of GPR18 from mouse (*Mus musculus*), rat (*Rattus norvegicus*) and human (*Homo sapiens*). Highlighted in dark grey are identical sequences and highlighted in light grey are similar sequences. Transmembrane domains (tm1-7) are marked above sequences. Note the greatest divergence occurs in the N-terminus of GPR18.

**Supplementary Figure 2:** Design strategy for constitutively active mutants of GPR18 and ADRA2A. Mutants were designed based on mutagenesis studies of the  $\alpha_{1B}$ -adrenergic receptor, ADRA1B (Kjelsberg et al., 1992; Scheer et al., 1996; Scheer et al., 1997). A) Snake plot diagrams of ADRA1B, ADRA2A and GPR18. Arrows mark residues mutated in GPCRs. B) Alignment of ADRA1B, ADRA2A, and GPR18 protein sequences. The amino acid residues targeted for mutation are bolded in red.

**Supplementary Figure 3:** Controls for functional coupling of  $G\alpha_{15}$  to GPCRs expressed in SCG neurons. For A-F) Left panel: Sample  $I_{Ca}$  trace using the double-pulse protocol. Center panel: Time course of  $I_{Ca}$  measurements from the double-pulse protocol.  $\circ$  represent the prepulse  $I_{Ca}$  amplitude,  $\bullet$  represent the postpulse  $I_{Ca}$  amplitude. Black dashed line represents NE (10  $\mu$ M) and grey dashed line represents glutamate (100  $\mu$ M) application. Right panels: graphs of the magnitude of NE or glutamate responses as measured by the change in FR ( $FR_{\text{during}} - FR_{\text{before}}$ ) and the response as a % of baseline  $I_{Ca}$ .

Inhibition of  $I_{Ca}$  by mGluR2 coupled to  $G\alpha_{15}$  (Figure 8A) was demonstrated with the following controls. A) Suppression of NE-mediated  $I_{Ca}$  inhibition by over-expression of  $G\alpha_{15}$ . This is likely due to the sequestration of all available  $G\beta\gamma$ . B) Recovery of NE-mediated inhibition of  $I_{Ca}$  by expressing  $G\beta_1$  and  $G\gamma_2$  along with  $G\alpha_{15}$ . This restores the stoichiometric balance of heterotrimeric G proteins. C) Lack of NE-mediated  $I_{Ca}$  inhibition in  $G\alpha_{15}\beta_1\gamma_2$ -expressing neurons following overnight PTX treatment. This indicates  $\alpha_2$ -adrenergic receptors, responsible for mediating NE responses in SCG neurons, remain coupled to  $G\alpha_{i/o}$  proteins in the presence of  $G\alpha_{15}\beta_1\gamma_2$ . D) Functional expression of mGluR2, which couples to  $G\alpha_{i/o}$  proteins to produce voltage-dependent inhibition of  $I_{Ca}$ . Note the large change in FR and decrease in  $I_{Ca}$  following glutamate application. E) Lack of glutamate-mediated  $I_{Ca}$  inhibition in mGluR2-expressing neurons following overnight PTX treatment, suggesting mGluR2 coupling exclusively to  $G\alpha_{i/o}$  proteins. F) Glutamate-mediated inhibition of  $I_{Ca}$  in cells co-expressing mGluR2 and  $G\alpha_{15}\beta_1\gamma_2$ . There appears to be a voltage-dependent component of  $I_{Ca}$  inhibition because of the relief of prepulse  $I_{Ca}$  inhibition by the depolarizing conditioning pulse and the change in FR during glutamate application. It is difficult to ascertain what proportion of

mGluR2 signaling is  $G\alpha_{15}$ -mediated, but there clearly is a  $G\alpha_{i/o}$  protein-coupled component. Thus, overnight treatment of cells with PTX is required to observe mGluR2 coupling to  $G\alpha_{15}$  because PTX potently uncouples the  $G\alpha_{i/o}$  family of proteins from their GPCRs.

**A** GPR18 clone:  
 TCGAGAATTCACCATGGCCACCCTGAGCAATCACAACCAGCTTGATCTTTCTAATGGCTCACACC  
 CAGAGGAATACAAAATCGCAGCCCTAGTCTTCTACAGCTGCATCTTCTGATTGGGCTGTTTGT  
 AATGTCACTGCGTTGTGGGTTTTTCAGCTGTACGACCAAGAAAAGAACCACAGTGACCATCTACAT  
 GATGAACGTTGCACTACTGGACCTCGTATTTATACTCAGTCTGCCCTTTTCGGATGTTTTACTATG  
 CAAAAGGCGAGTGGCCATTTGGAGAGTACTTCTGCCACATTCTTGGGGCCCTGGTGGTGTTTTAC  
 CCAAGCCTCGCTCTGTGGCTTCTTGCTTTTCATTAGTGCTGACAGATACATGGCCATCGTACAGCC  
 AAAATATGCCAAGGAGCTGAAGAACACCCGGCAAGGCCGTGCTTGCCTGTGGGGGGTCTGGGTAA  
 TGACCCTGACCACCACTGTCCCCCTGCTACTGCTCTACGAAGACCCAGACAAGGCCTCCTCCCCA  
 GCCACCTGCCTGAAGATCTCCGACATCACCCACTTAAAAGCTGTCAACGTGCTCAACTTCACGCG  
 ACTCATATTTTTTCTTCTGATCCCTTTGTTTCATCATGATCGGGTGTACGTGGTCATCATTACACA  
 GTCTCTCCGAGGGCAGACGTCTAAGCTGAAGCCCAAGGTCAAGGAGAAGTCCATACGGATCATC  
 ATGACCCTCCTGCTGCAGGTGCTCGTCTGCTTTCGTGCCCTTCCACATCTGCTTTGCCGTCTGAT  
 GCTACAAGGACAGGAGAACAGCTATAGCCCCTGGGGAGCCTTACCACCTTCCCTCATGAACCTCA  
 GCACCTGTCTCGATGTAGTCTCTACTACATCGTTTTCCAAACAGTTCCAGGCTCGAGTCATCAGC  
 GTCATGCTGTACCGCAATTACCTTTCGAGTGTTCGCAGAAAAAGTGTCCGATCGGGCAGTTTACG  
 GTCACTTAGCAACATGAACAGTGAGATGCTTTGAGCGGCCGCTCGAGCAGAC

**B** GPR18-EGFP (junction)  
 - AGT GAG ATG CTT CCG CGG GCC CGG GAT CCA CCG GTC GCC ACC **ATG GTG AGC -**

3xHA-GPR18 (junction)  
 - TAC CCA TAC GAT GTT CCA GAT TAC GCT GAT GCC ACC CTG -

GPR18-3xHA (junction)  
 - AGT GAG ATG CTT GAT ATC TAC CCA TAC GAT GTT CCA GAT TAC GCT -

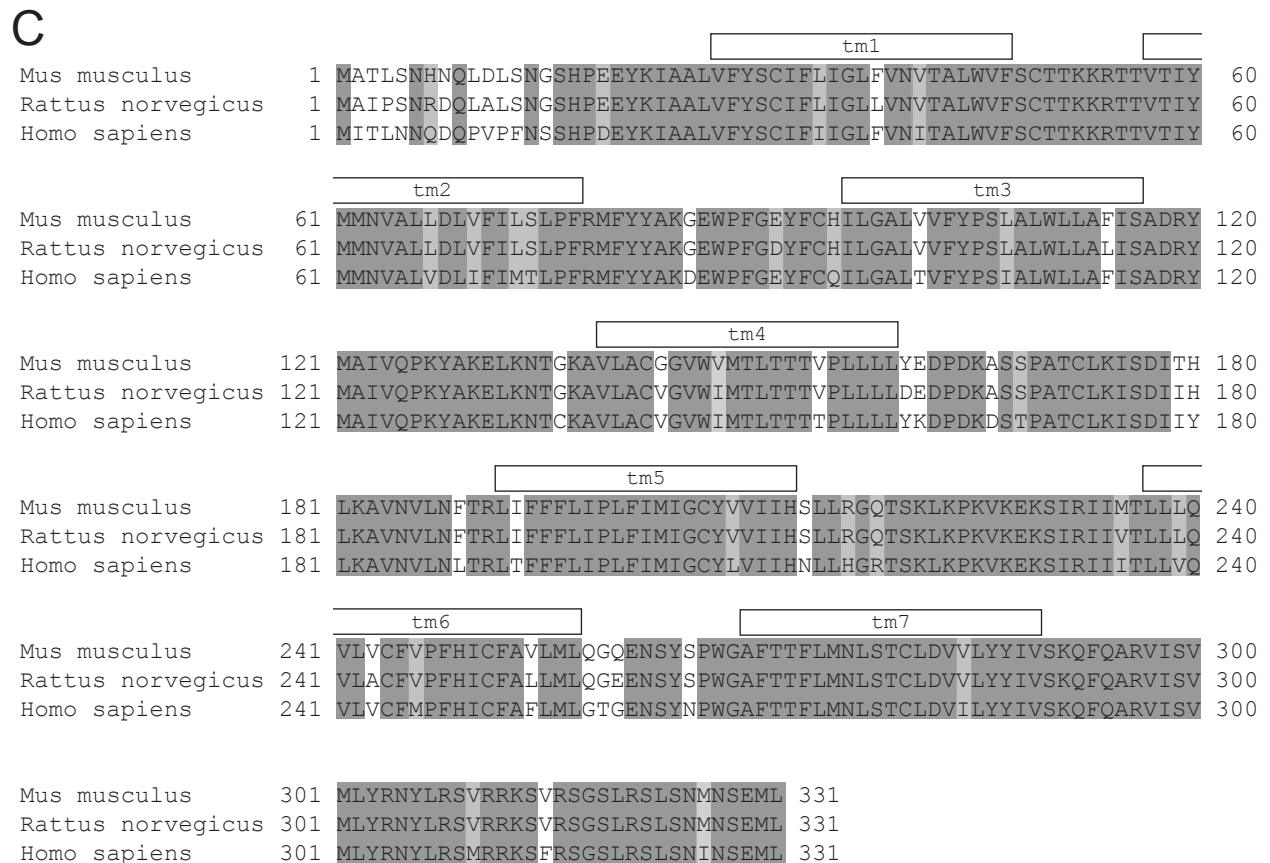

Supplemental Figure 1

## A. Snake plot diagrams

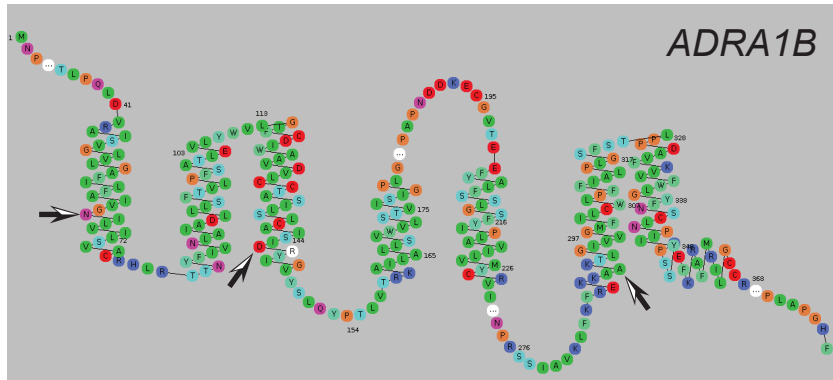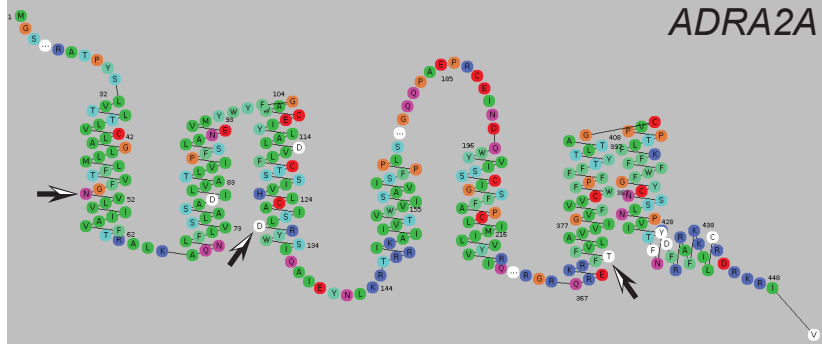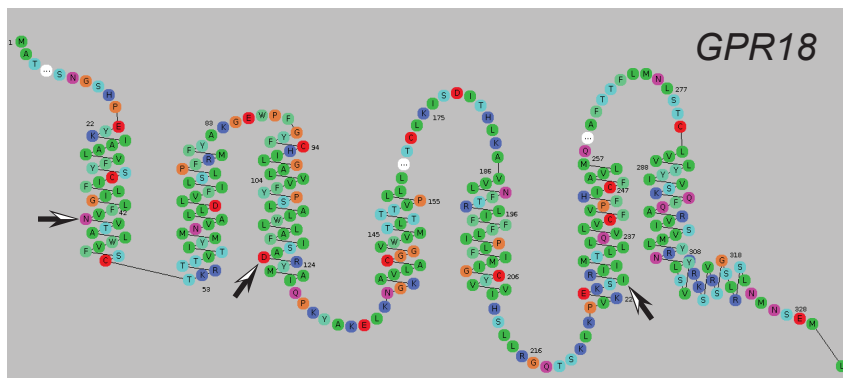

Supplemental Figure 2

## B. Sequence alignment

```

ADRA1B  MNPDLDTGHNTSAPAHWGELKDDNFTGPNQTSNNTLPQLDVTRAI SVGL
ADRA2A  -----MGSLQPEAGNASWNGTEAPGGGARATPYSLQVTLTLVC
GPR18   -----MATLSNHNQLDLSNGSHPEEYKIAALVFYSC

ADRA1B  VLGAFILFAIVGNILVILSVACNRHLRTPNTYFIVNLA IADLLLSFTVLP
ADRA2A  LAGLLMLFTVFGNVLV IAVFTSRALKAPQNLFLVSLASADILVATLVIP
GPR18   IF----LIGLFVNVTALWVFSCTTKKRRTVTIYMMNVALLDLVFILS-LP

ADRA1B  FSATLEVLGYWVLGRIFCDIWAADVLCCTASILSLCAISIDRYIGVRY S
ADRA2A  FSLANEVMGYWYFGKAWCEIYLALDVLFACTSSIVHLCAISLDRYWSITQA
GPR18   FRMFY YAKGEWPFGEYFCHILGALVVFYPSLALWLLAFISADRYMAIVQP

ADRA1B  LQYPTLVTRRKA IALLSVVWLSTVISIGPLLGWKEPAPND DKE-----C
ADRA2A  IEYNLNRTPRRIKAIIVTVWVISAVISFPPLISIEKKAGGGGQPAEPRC
GPR18   KYAKELKNTGKAVLACGGVWVMTLT TTVPLLLLYEDDPKASSPATCLKIS

ADRA1B  GVTEEPFYALF---SSLGSFYIPLAVILVMYCRVYIVAKR TTKNLEAGVM
ADRA2A  EINDQKWYVIS---SCIGSF FAPCLIMILVVR IYQIAKRRT-----
GPR18   DITHLKAVNVNLFNTRLIFFFLIPLFIMIGCYVVI IHSLLR-----

ADRA1B  KEMSNSKELTLRIH SKNFHEDTLSSTKAKGHNPRSSI AVKLFKFSREKKA
ADRA2A  -----VPPSRRGPDAAAALPGAERPN
GPR18   -----GQTSKLPKPKVKEKS

ADRA1B  AKTLGIVVGMFILCWL PPFIALPLGSLFSTLKP PDAVFKVVFWLGYFN SC
ADRA2A  GLGPERGVGRVGA EAELPVQLNGAPGEPAPAGPRDADGLDLESSSSEH
GPR18   IRIIMTLLLQVLVCFV PPHICFAVLM LQGQENSYSYPWGAFTTFLMNLSTC

ADRA1B  LNPIIYPCSSKEFKRAFMRILGCQCRGRRRRRRRLGGCAYTYR PWTRG
ADRA2A  AERP PPRRSERGPRAKSKARASQVKPGDSLPRRG-----PG
GPR18   LDVVLYYIVSKQFQARV ISVMLYRN-----

ADRA1B  GSLERSQSRKDSLDDSGSCMSGSQRTLPSASPSPGYLGRGTQPPVELCAF
ADRA2A  APGPGAPATGAGEERG GVAKASRWRGRQNREKRFTFVLAVVIGVFVVCWF
GPR18   -----YLRSVRKSVRSGSLRSLSNMNSEML-----

ADRA1B  PEWKPGALLSLPEPPGRGRRLDSGPLFTFKLLGDPESPGTEGDTSNGGCD
ADRA2A  PFFFYTYTLTAVG---CSVPPTLKF FFFWFGYCNSSLNPIYITIFNHDFRR
GPR18   -----

ADRA1B  TTDLANGQPGFKSNMPLAPGHF
ADRA2A  AFKKILCRGDRKRIV-----
GPR18   -----

```

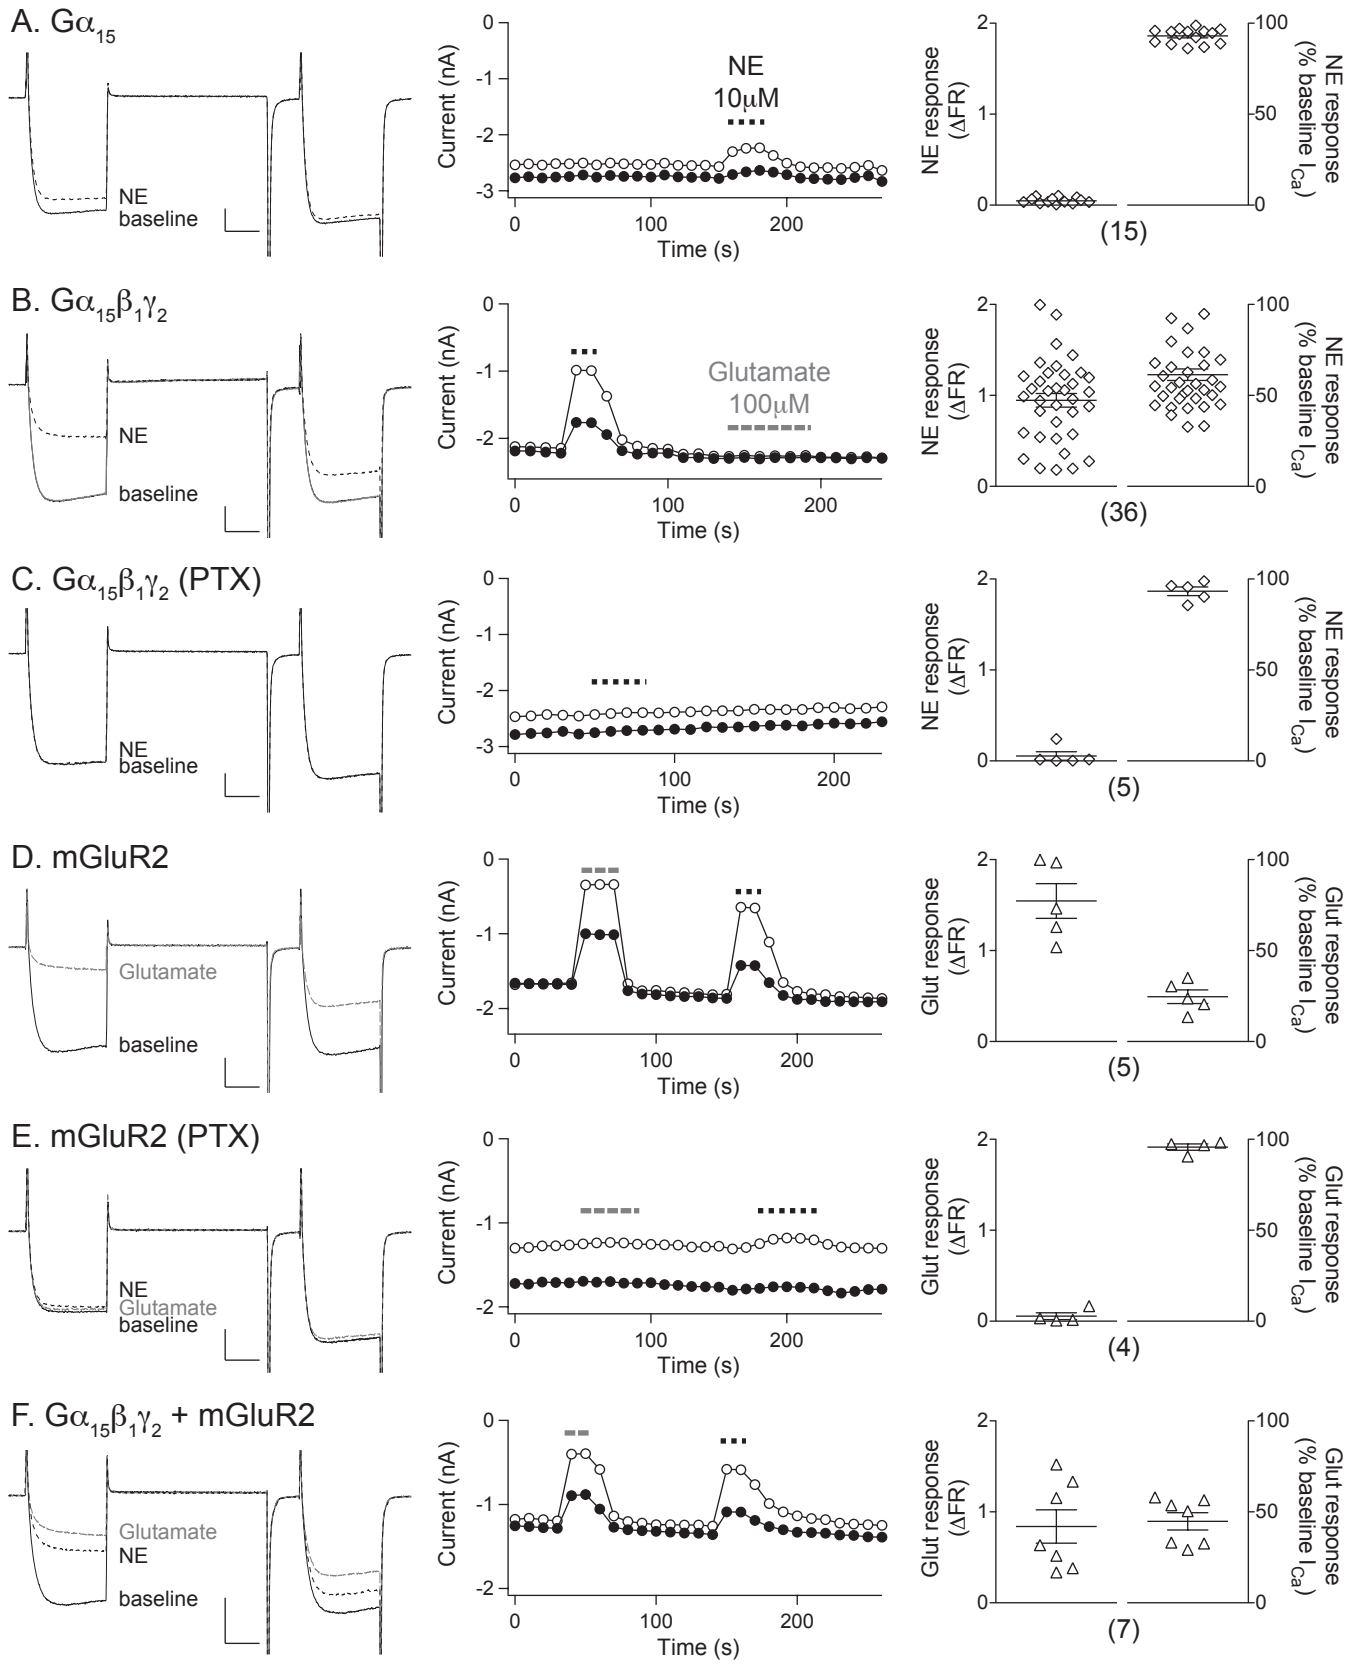

Supplemental Figure 3
